# Supplementary material for: Majocchi’s granuloma caused by Trichophyton rubrum in a type 2 diabetes patient and Review of Published Literature
Source: Research Square preprint supplement (doi:10.21203/rs.3.rs-4278507/v1), 2024-04-26
Supplement: Supplementary file 1 [file 0ec5d18882a1c9b1e9cd1664.xlsx]

## Sheet: Sheet1
No.	Age/Sex	Infection site	Lesions and accompanying symptoms	Underlying disease	Therapy
1	66/M	Scrotum	Numerous hard papules,mild pruritic	Hypertension, chronic sinusitis	Itraconazole
2	53/M	Inguinal,genital area	Multiple distinct violaceous nodules	liver transplantation	Itraconazole
3	66/M	Left lower leg and foot	Slightly tender nodules	Heart transplantation	Itraconazole
4	48/F	Back, buttock and thigh.	Red papules and itchy nodular	liver transplant	Terbinafine
5	49/M	Feet	Papulonodular lesions	Heart transplantation	Itraconazole
6	46/M	Face	Erythema, papule and nodules	None	Itraconazole
7	27/F	Pubic area	Inflammatory plaques,follicular lesions	None	Terbinafine
8	37/F	Face	Papules, nodules, and abscesses	None	Itraconazole
9	56/M	Face and feet	Solid papule,maceration,scaling	Hypertension	Itraconazole
10	11/M	Scalp,cheek,neck	Erythematous macules and papules	Non-Bullous Congenital Ichthyosiform Erythroderma	Terbinafine
11	66/M	Face and kidney transplant site	Nonpainful nodular erythematous	Kidney transplant	Voriconazole and Terbinafine
12	65/M	Generalized subcutaneous	Multiple papules and subcutaneous nodules and onychomycosis.	Diabetes and Bullous Pemphigoid	Terbinafine
13	71/F	Face, scalp, neck and arms	Annular, non-pruritic, erythematous plaques	Cushingoid	Griseofulvin
14	73/M	Buttock	Nodule and fluctuant subcytaneous cyst	Interstitial pneumonia	Itraconazole
15	41/M	Right corner of mouth	Verrucous, erythematous nodule	None	Terbinafine
16	65/M	Right thigh	Itchy red papules and nodules	Tinea pedis and tinea corporis	Terbinafine
17	80/M	Left sole	Subcutaneous nodules	CARD9 deficiency	Itraconazole
18	53/M	Right forearm	Keloid-like plaque	None	Itraconazole
19	43/M	Right forearm, face, and neck	Erythematous scaly patches and plaques	Psoriasis	Adalimumab
20	45/M	Submandibular, neck, and chest	Erythema, papule, and nodules	None	Terbinafine
21	49/M	Face	Erythematous, papules,plaques, and nodules	Mixed bacterial infection	Voriconazole
